# Supplementary material
Source: Springer Nature journal article supplement (https://www.springermedizin.de/resource/supplementary/12889_2014_6931_MOESM1_ESM.pdf/9499340)
Supplement: MOESM1 [file 9499340]

## **Additional file 1 – Search terms**

As run in Pubmed/Medline and other electronic databases

1. multimorbidity
2. multimorbidities
3. multi-morbidity
4. multi-morbidities
5. multimorbiditie
6. multi-morbiditie
7. „multimorbidity’s“
8. „multi-morbidity’s“
9. multimorbid
10. multi-morbid
11. comorbidity
12. co-morbidity
13. comorbiditie
14. comorbidities
15. co-morbidities
16. comorbid
17. co-morbid
18. “comorbidity’s“
19. “co-morbidity’s“
20. “multiple chronic condition”
21. “multiple chronic conditions”
22. “multiple chronic illness“
23. “multiple chronic disease”
24. “multiple chronic diseases“
25. “chronic medical condition ”
26. “chronic medical conditions ”
27. “chronic clinical condition”
28. “chronic clinical conditions”
29. polymorbidity
30. “polymorbidity’s”
31. poly-morbidity
32. “poly-morbidity’s”
33. polymorbiditie
34. poly-morbiditie
35. polymorbidities
36. poly-morbidities
37. polymorbid
38. poly-morbid

Limited to English or German language and time period 1990 – 2011.
